# Supplementary material for: Ethyl Acetate Extract of Dracocephalum heterophyllum Benth Ameliorates Nonalcoholic Steatohepatitis and Fibrosis via Regulating Bile Acid Metabolism, Oxidative Stress and Inhibiting Inflammation
Source: MDPI journal article supplement (doi:10.3390/separations9100273), 2022-09-30

# Ethyl Acetate Extract of *Dracocephalum heterophyllum* Benth Ameliorates Nonalcoholic Steatohepatitis and Fibrosis via Regulating Bile Acid Metabolism, Oxidative Stress and Inhibiting Inflammation

Yan Fang <sup>1,2,†</sup>, Dandan Sun <sup>3,4,†</sup>, Gang Li <sup>2</sup>, Yue Lv <sup>2</sup>, Jia Li <sup>3</sup>, Qilan Wang <sup>1,\*</sup> and Jun Dang <sup>1,\*</sup>

<sup>1</sup> Qinghai Provincial Key Laboratory of Tibetan Medicine Research, Key Laboratory of Tibetan Medicine Research, Northwest Institute of Plateau Biology, Chinese Academy of Sciences, Xining 810001, China

<sup>2</sup> Center for Mitochondria and Healthy Aging, College of Life Sciences, Yantai University, Yantai 264005, China

<sup>3</sup> School of Chinese Materia Medica, Nanjing University of Chinese Medicine, Nanjing 210023, China

<sup>4</sup> State Key Laboratory of Drug Research, Shanghai Institute of Materia Medica, Chinese Academy of Sciences, Shanghai 201203, China

\* Correspondence: wql@nwipb.cas.cn (Q.W.); dangjun@nwipb.cas.cn (J.D.)

† These authors contributed equally to this work.

## Table of Contents

|                                                                                                    |   |
|----------------------------------------------------------------------------------------------------|---|
| Figure S1. ESI mass spectrum of rosmarinic acid.....                                               | 3 |
| Figure S2. $^1\text{H}$ NMR spectrum (600 MHz) of rosmarinic acid (in $\text{MeOH-}d_4$ ). ....    | 4 |
| Figure S3. $^{13}\text{C}$ NMR spectrum (151 MHz) of rosmarinic acid (in $\text{MeOH-}d_4$ ) ..... | 5 |

**Figure S1.** ESI mass spectrum of rosmarinic acid.

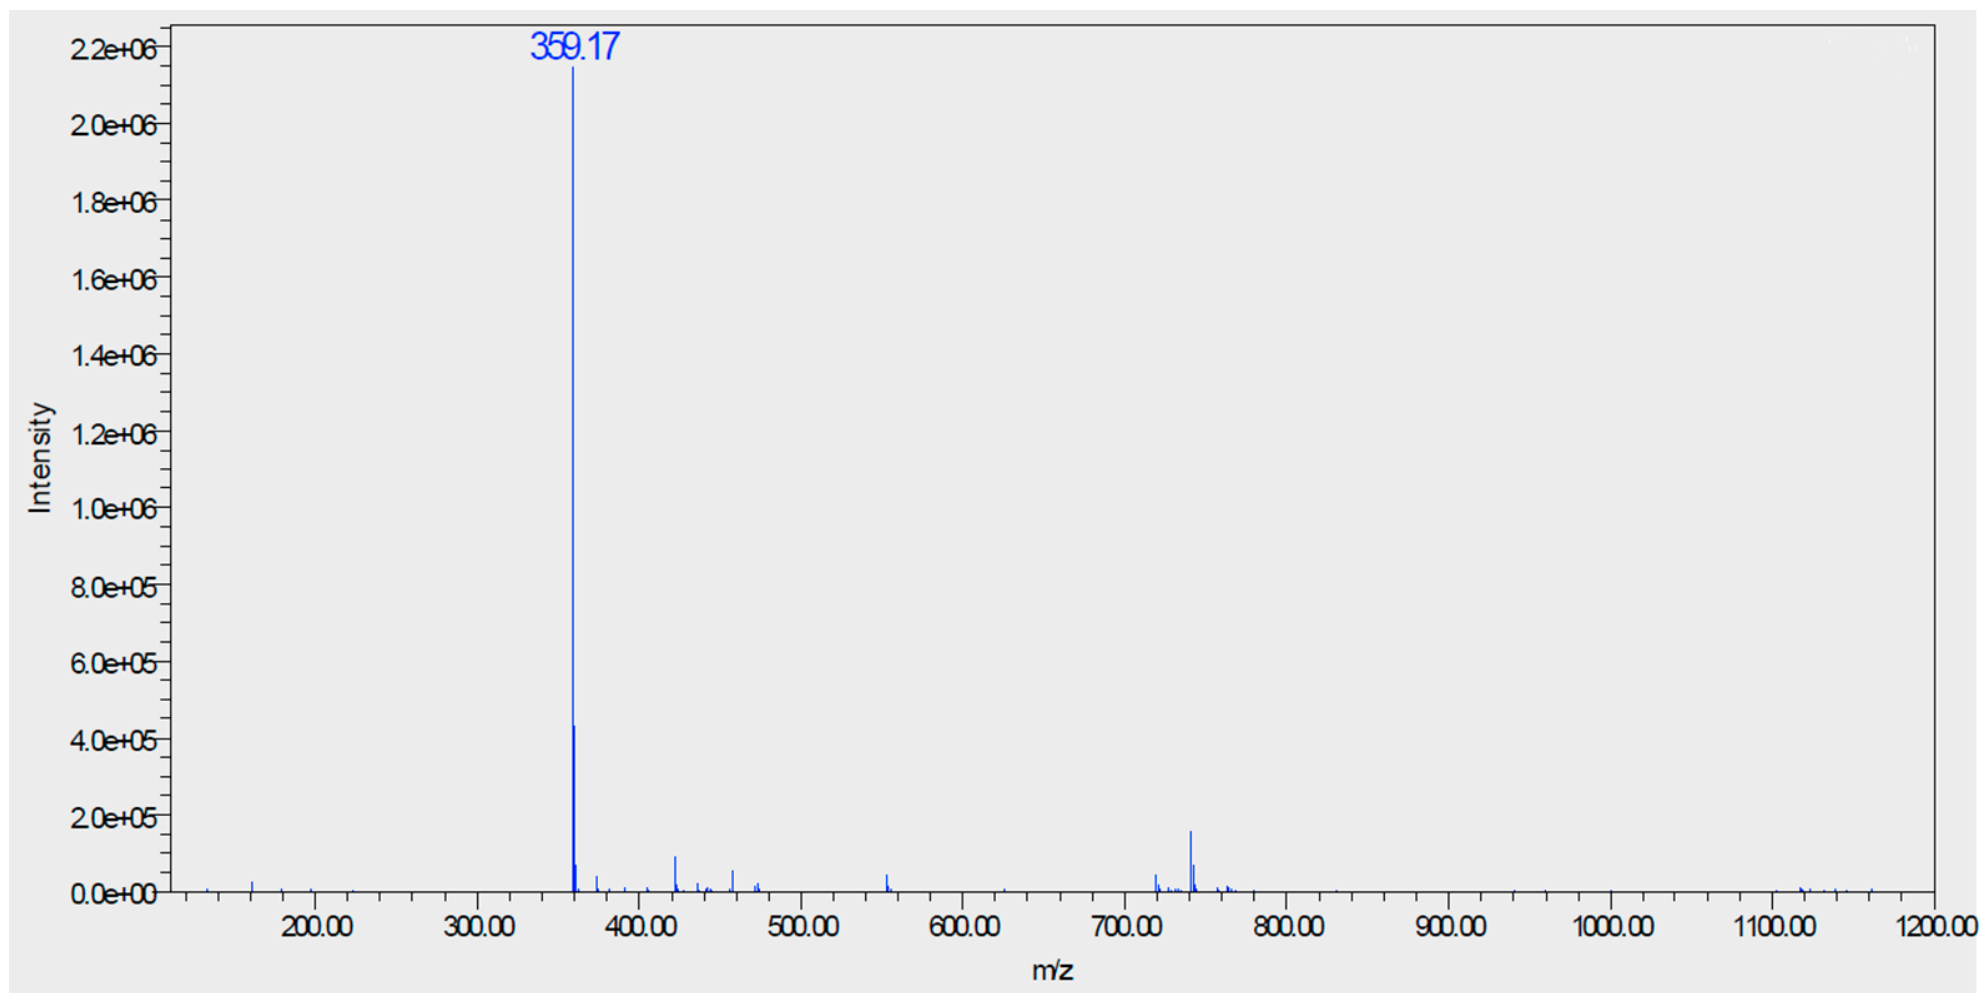

**Figure S2.**  $^1\text{H}$  NMR spectrum (600 MHz) of rosmarinic acid (in  $\text{MeOH-}d_4$ ).

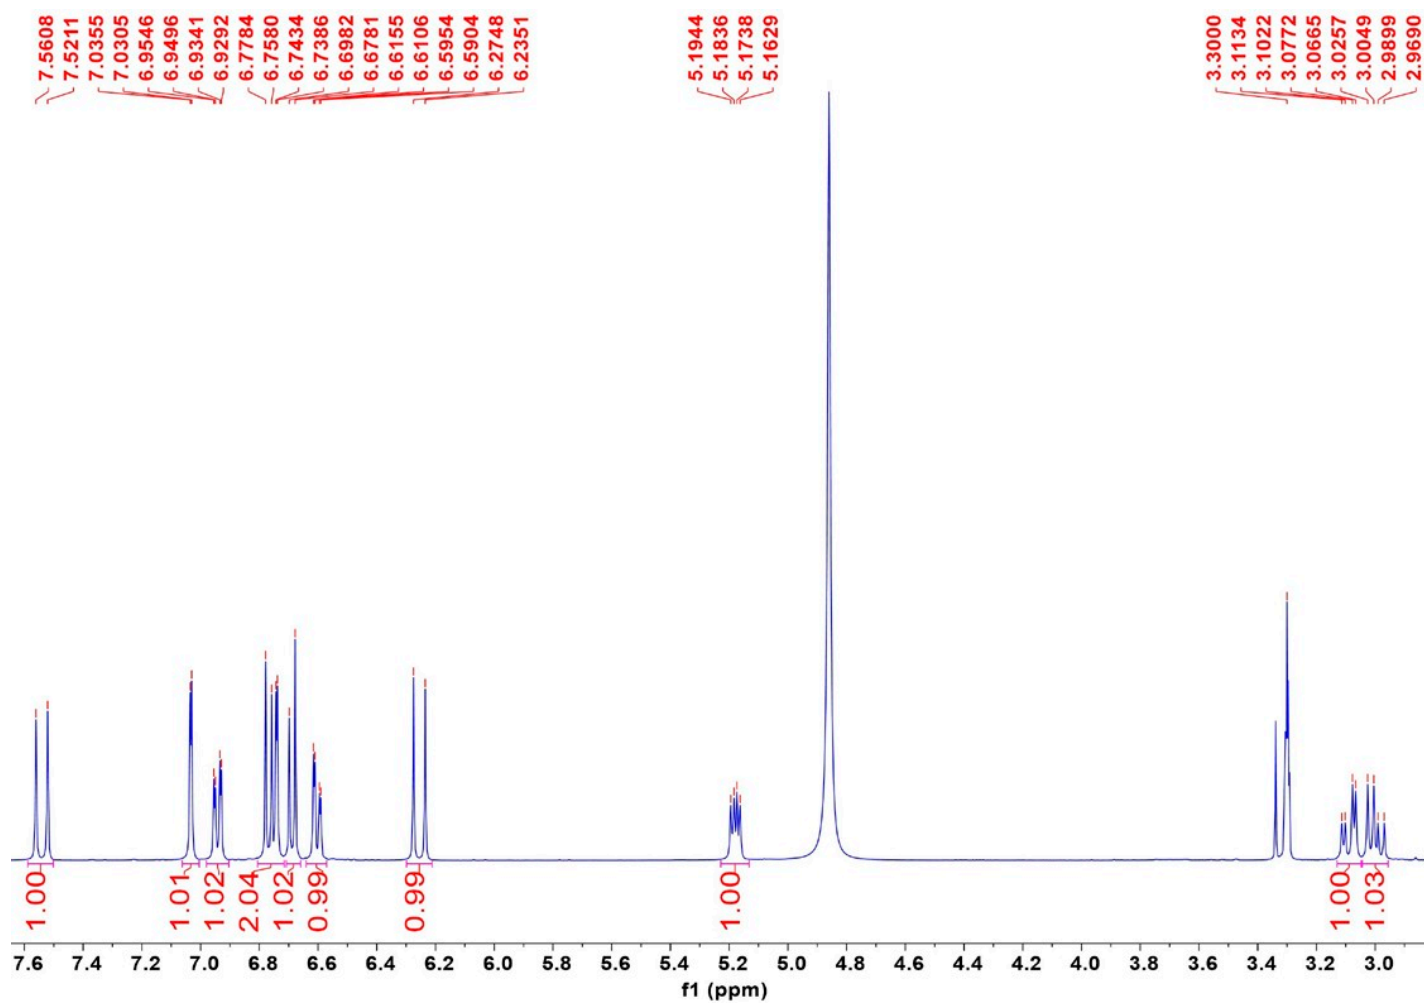

**Figure S3.**  $^{13}\text{C}$  NMR spectrum (151 MHz) of rosmarinic acid (in  $\text{MeOH-}d_4$ ).

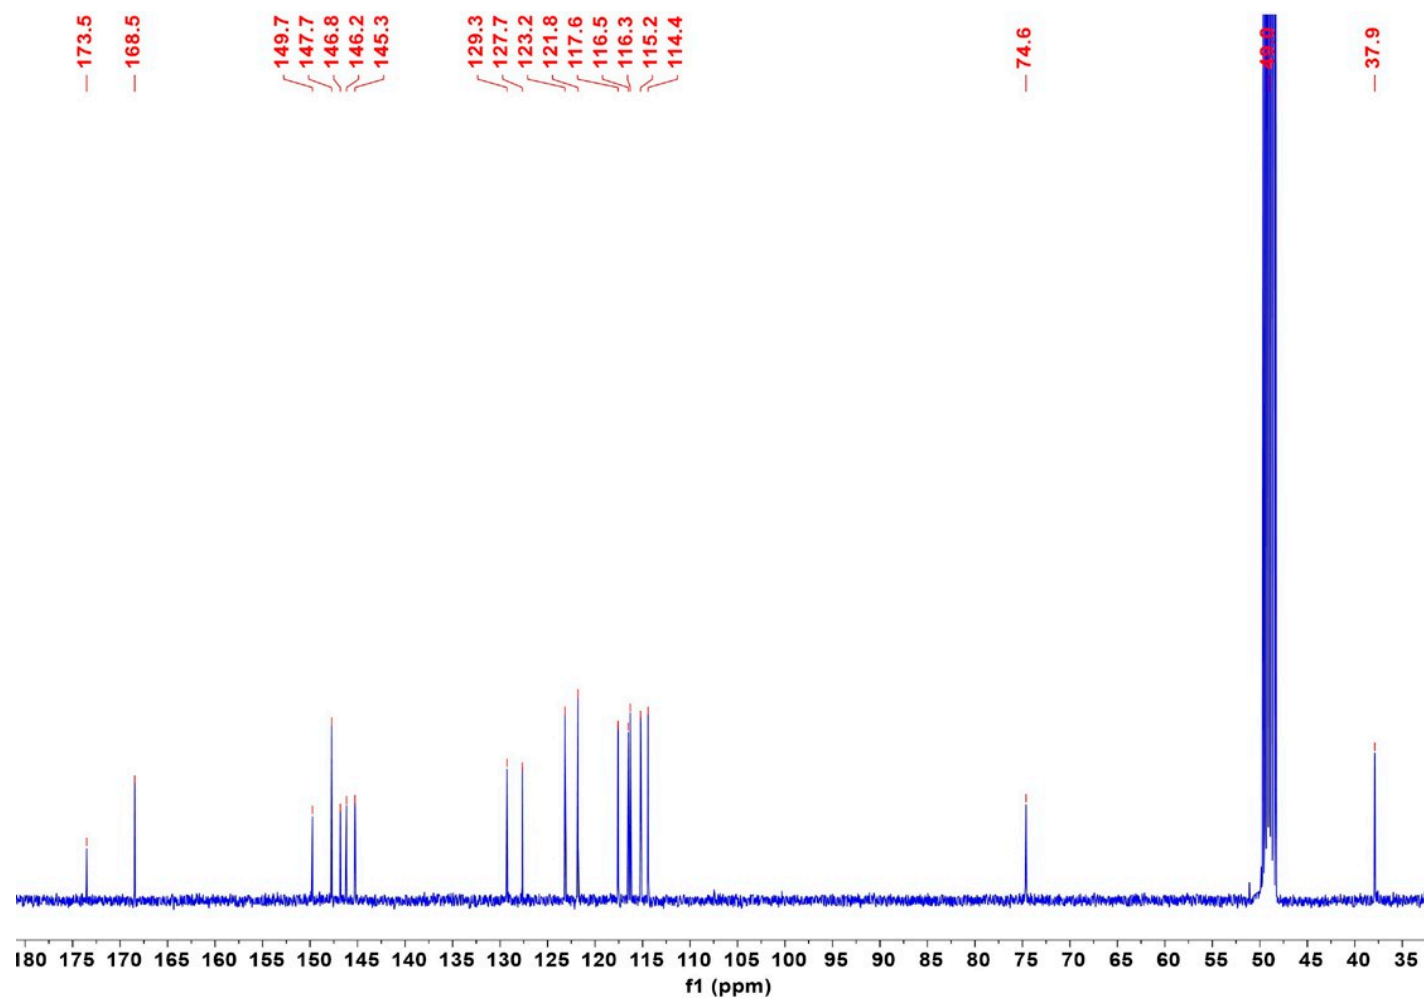

Supplement: s1 [file s1]
